# Supplementary material
Source: ML conference proceedings conference paper supplement (https://proceedings.mlr.press/v130/bao21a.html)
Supplement: Supplementary file 1 [file bao21a-supp.pdf]

---

# One-Round Communication Efficient Distributed M-Estimation: Supplementary Materials

---

## A Proof of Main Results

### A.1 Proof of Theorem 5.1

First, we denote another  $\ell_2$  ball with smaller radius  $U_\delta := \{\boldsymbol{\theta} : \|\boldsymbol{\theta} - \boldsymbol{\theta}^*\|_2 \leq \delta_\rho\}$  where  $\delta_\rho = \min\{\rho, \rho\lambda_-/(2M)\}$ . Then define some good events:

$$\begin{aligned} E_{0k} &:= \left\{ \|\nabla L_k(\boldsymbol{\theta}^*)\|_2 \leq \frac{(1-\rho)\lambda_- \delta_\rho}{2} \right\} \\ E_{1k} &:= \left\{ \frac{1}{n} \sum_{i \in \mathcal{H}_k} M(\mathbf{X}_i) \leq M \right\}, \text{ and} \\ E_{2k} &:= \left\{ \|\mathbf{H}_k(\boldsymbol{\theta}^*) - \mathbf{I}(\boldsymbol{\theta}^*)\|_2 \leq \frac{\rho\lambda_-}{2} \right\}. \end{aligned} \tag{A.1}$$

**Lemma A.1.** *Suppose the condition (C5) holds, then*

$$\max_{0 \leq k \leq m} \|\nabla L_k(\boldsymbol{\theta}^*)\|_2 \leq C_2 \sqrt{\frac{p}{n}} + t$$

and

$$\left\| \frac{1}{m+1} \sum_{k=0}^m \nabla L_k(\boldsymbol{\theta}^*) \right\|_2 \leq C_2 \sqrt{\frac{p}{N}} + t$$

hold with probability at least  $1 - C_3 m \exp(-C_4 n t^2)$  and  $1 - C_3 \exp(-C_4 N t^2)$  respectively, where  $C_2, C_3$  and  $C_4$  are three universal positive constants.

Using the Lemma 6 and 7 in [Zhang et al. \(2013\)](#) and Lemma A.1, we can obtain Lemma A.2 and Lemma A.3.

**Lemma A.2.** *Under event  $E = \bigcap_{k=1}^m E_{0k} \cap E_{1k} \cap E_{2k}$ , for  $\boldsymbol{\theta} \in U_\delta$  we have*

$$\lambda_{\min}(\mathbf{H}_k(\boldsymbol{\theta})) \geq (1-\rho)\lambda_-. \tag{A.2}$$

And for each local estimator  $\widehat{\boldsymbol{\theta}}_k$  we have

$$\left\| \widehat{\boldsymbol{\theta}}_k - \boldsymbol{\theta}^* \right\|_2 \leq \frac{2 \|\nabla L_k(\boldsymbol{\theta}^*)\|_2}{(1-\rho)\lambda_-}. \tag{A.3}$$

**Lemma A.3.** *Assume condition (C4) hold, there exists some positive constant  $C_1$  such that*

$$\mathbb{E} \left( \|\mathbf{H}_k(\boldsymbol{\theta}^*) - \mathbf{I}(\boldsymbol{\theta}^*)\|_2^K \right) \leq C_1 L^K \left( \frac{\log 2p}{n} \right)^{K/2}.$$

**Lemma A.4.** *Denote the event  $E = \bigcap_{k=1}^m E_{0k} \cap E_{1k} \cap E_{2k}$ , then there exist three positive constants  $c_0, c_1$  and  $c_2$  such that*

$$\mathbb{P}(E^c) \leq m \left( 2e^{(-c_0 n + 2p)} + c_1 n^{-K/2} + c_2 \left( \frac{\log 2p}{n} \right)^{K/2} \right).$$

*Proof of Theorem 5.1.* Using the fact  $\nabla L_k(\widehat{\boldsymbol{\theta}}_k) = 0$ , we have

$$\nabla L_k(\boldsymbol{\theta}^*) = \mathbf{H}_k(\widetilde{\boldsymbol{\theta}}_k) \left( \boldsymbol{\theta}^* - \widehat{\boldsymbol{\theta}}_k \right)$$

where  $\widetilde{\boldsymbol{\theta}}_k$  lies between  $\widehat{\boldsymbol{\theta}}_k$  and  $\boldsymbol{\theta}^*$ . It implies that

$$\begin{aligned} \boldsymbol{\theta}^* - \widehat{\boldsymbol{\theta}}_{\text{CASE}} &= \left( \frac{1}{m+1} \sum_{k=0}^m \mathbf{H}_0(\widehat{\boldsymbol{\theta}}_k) \right)^{-1} \frac{1}{m+1} \sum_{k=0}^m \mathbf{H}_0(\widehat{\boldsymbol{\theta}}_k) \mathbf{H}_k(\widetilde{\boldsymbol{\theta}}_k)^{-1} \nabla L_k(\boldsymbol{\theta}^*) \\ &= \left( \frac{1}{m+1} \sum_{k=0}^m \mathbf{H}_0(\widehat{\boldsymbol{\theta}}_k) \right)^{-1} \frac{1}{m+1} \sum_{k=0}^m \nabla L_k(\boldsymbol{\theta}^*) \\ &\quad + \left( \frac{1}{m+1} \sum_{k=0}^m \mathbf{H}_0(\widehat{\boldsymbol{\theta}}_k) \right)^{-1} \frac{1}{m+1} \sum_{k=0}^m \left( \mathbf{H}_k(\widetilde{\boldsymbol{\theta}}_k) \right)^{-1} \left( \mathbf{H}_0(\widehat{\boldsymbol{\theta}}_k) - \mathbf{H}_k(\widetilde{\boldsymbol{\theta}}_k) \right) \nabla L_k(\boldsymbol{\theta}^*), \end{aligned}$$

Note that under event  $E$ , we have

$$\begin{aligned} &\left\| \mathbf{H}_0(\widehat{\boldsymbol{\theta}}_k) - \mathbf{H}_k(\widetilde{\boldsymbol{\theta}}_k) \right\|_2 \\ &\leq \left\| \mathbf{H}_0(\widehat{\boldsymbol{\theta}}_k) - \mathbf{H}_0(\boldsymbol{\theta}^*) \right\|_2 + \left\| \mathbf{H}_0(\boldsymbol{\theta}^*) - \mathbf{H}_k(\boldsymbol{\theta}^*) \right\|_2 + \left\| \mathbf{H}_k(\boldsymbol{\theta}^*) - \mathbf{H}_k(\widetilde{\boldsymbol{\theta}}_k) \right\|_2 \\ &\leq M \|\widehat{\boldsymbol{\theta}}_k - \boldsymbol{\theta}^*\|_2 + M \|\widetilde{\boldsymbol{\theta}}_k - \boldsymbol{\theta}^*\|_2 + \|\mathbf{H}_0(\boldsymbol{\theta}^*) - \mathbf{H}_k(\boldsymbol{\theta}^*)\|_2 \\ &\leq 2M \|\widehat{\boldsymbol{\theta}}_k - \boldsymbol{\theta}^*\|_2 + \|\mathbf{H}_0(\boldsymbol{\theta}^*) - \mathbf{H}_k(\boldsymbol{\theta}^*)\|_2 \\ &\leq \frac{4M \|\nabla L_k(\boldsymbol{\theta}^*)\|_2}{(1-\rho)\lambda_-} + \|\mathbf{H}_0(\boldsymbol{\theta}^*) - \mathbf{H}_k(\boldsymbol{\theta}^*)\|_2, \end{aligned} \tag{A.4}$$

where the second inequality follows from the definition of  $E_{1k}$  and the third inequality follows from (A.3) in Lemma A.2. Combining with (A.2) in Lemma A.2, we have

$$\begin{aligned} \left\| \mathbf{H}_k(\widetilde{\boldsymbol{\theta}}_k)^{-1} \left( \mathbf{H}_0(\widehat{\boldsymbol{\theta}}_k) - \mathbf{H}_k(\widetilde{\boldsymbol{\theta}}_k) \right) \nabla L_k(\boldsymbol{\theta}^*) \right\|_2 &\leq \left\| \mathbf{H}_k(\widetilde{\boldsymbol{\theta}}_k)^{-1} \left( \mathbf{H}_0(\widehat{\boldsymbol{\theta}}_k) - \mathbf{H}_k(\widetilde{\boldsymbol{\theta}}_k) \right) \right\|_2 \|\nabla L_k(\boldsymbol{\theta}^*)\|_2 \\ &\leq \frac{4M \|\nabla L_k(\boldsymbol{\theta}^*)\|_2^2}{(1-\rho)^2 \lambda_-^2} + \frac{\|\mathbf{H}_0(\boldsymbol{\theta}^*) - \mathbf{H}_k(\boldsymbol{\theta}^*)\|_2 \|\nabla L_k(\boldsymbol{\theta}^*)\|_2}{(1-\rho)\lambda_-}. \end{aligned}$$

On the other hand, we make use of the fact that: for any matrix  $\mathbf{A}, \mathbf{B} \in \mathbb{R}^{p \times p}$ ,

$$\|(\mathbf{A} + \mathbf{B})^{-1} - \mathbf{A}^{-1}\|_2 \leq \|\mathbf{A}^{-1}\|_2^2 \|\mathbf{B}\|_2.$$

Now let  $\mathbf{A} = \mathbf{I}(\boldsymbol{\theta}^*)$  and  $\mathbf{B} = \mathbf{H}_0(\widehat{\boldsymbol{\theta}}_k) - \mathbf{I}(\boldsymbol{\theta}^*)$  and using Lemma A.2 again, we have

$$\begin{aligned} \left\| \left( \frac{1}{m+1} \sum_{k=0}^m \mathbf{H}_0(\widehat{\boldsymbol{\theta}}_k) \right)^{-1} - \mathbf{I}(\boldsymbol{\theta}^*)^{-1} \right\|_2 &\leq \|\mathbf{I}(\boldsymbol{\theta}^*)^{-1}\|_2^2 \left\| \frac{1}{m+1} \sum_{k=0}^m \mathbf{H}_0(\widehat{\boldsymbol{\theta}}_k) - \mathbf{I}(\boldsymbol{\theta}^*) \right\|_2 \\ &\leq \max_{0 \leq k \leq m} \left\| \mathbf{H}_0(\widehat{\boldsymbol{\theta}}_k) - \mathbf{I}(\boldsymbol{\theta}^*) \right\|_2 \|\mathbf{I}(\boldsymbol{\theta}^*)^{-1}\|_2^2 \\ &\leq \max_{0 \leq k \leq m} \left( \left\| \mathbf{H}_0(\widehat{\boldsymbol{\theta}}_k) - \mathbf{H}_0(\boldsymbol{\theta}^*) \right\|_2 + \|\mathbf{H}_0(\boldsymbol{\theta}^*) - \mathbf{I}(\boldsymbol{\theta}^*)\|_2 \right) \|\mathbf{I}(\boldsymbol{\theta}^*)^{-1}\|_2^2 \\ &\leq \frac{2M \|\nabla L_k(\boldsymbol{\theta}^*)\|_2}{(1-\rho)\lambda_-^3} + \lambda_-^2 \max_{0 \leq k \leq m} \|\mathbf{H}_k(\boldsymbol{\theta}^*) - \mathbf{I}(\boldsymbol{\theta}^*)\|_2 \\ &= o(1). \end{aligned}$$

Then under event  $E$ , there exists some positive constant  $C$  such that

$$\|u_n\|_2 \leq C \max_{0 \leq k \leq m} \left( \frac{4M \|\nabla L_k(\boldsymbol{\theta}^*)\|_2^2}{(1-\rho)^2 \lambda_-^3} + \frac{\|\mathbf{H}_0(\boldsymbol{\theta}^*) - \mathbf{H}_k(\boldsymbol{\theta}^*)\|_2 \|\nabla L_k(\boldsymbol{\theta}^*)\|_2}{(1-\rho)\lambda_-^2} \right).$$

The result follows from Lemma A.4.  $\square$

## A.2 Proof of Corollary 5.1

*Proof.* For any  $\varepsilon > 0$ ,

$$\begin{aligned} & \sum_{i=1}^N \mathbb{E} \left( \left\| \nabla l(\mathbf{X}_i, \boldsymbol{\theta}^*) / \sqrt{N} \right\|_2^2 \mathbb{I} \left\{ \left\| \nabla l(\mathbf{X}_i, \boldsymbol{\theta}^*) / \sqrt{N} \right\|_2 > \varepsilon \right\} \right) \\ &= \mathbb{E} \left( \left\| \nabla l(\mathbf{X}, \boldsymbol{\theta}^*) \right\|_2^2 \mathbb{I} \left\{ \left\| \nabla l(\mathbf{X}, \boldsymbol{\theta}^*) / \sqrt{N} \right\|_2 > \varepsilon \right\} \right) \\ &\leq \left[ \mathbb{E} \left\| \nabla l(\mathbf{X}, \boldsymbol{\theta}^*) \right\|_2^4 \right]^{1/2} \left[ \mathbb{P} \left( \left\| \nabla l(\mathbf{X}, \boldsymbol{\theta}^*) / \sqrt{N} \right\|_2 > \varepsilon \right) \right]^{1/2}. \end{aligned}$$

Using condition (C5), we can prove for any  $\lambda \in \mathbb{R}$

$$\mathbb{E} [\exp(\lambda \|\nabla l(\mathbf{X}, \boldsymbol{\theta}^*)\|_2)] \leq 2e^{\lambda^2}. \quad (\text{A.5})$$

Then using Markov's inequality and (A.5), we have

$$\mathbb{P} \left( \left\| \nabla l(\mathbf{X}, \boldsymbol{\theta}^*) / \sqrt{N} \right\|_2 > \varepsilon \right) \leq 2 \exp \left( \frac{\lambda^2}{N} - \lambda \varepsilon \right) \leq 2 \exp \left( -\frac{N\varepsilon}{4} \right).$$

Moreover note that

$$\begin{aligned} \mathbb{E} \left\| \nabla l(\mathbf{X}, \boldsymbol{\theta}^*) \right\|_2^4 &= \int_0^\infty \mathbb{P} \left( \left\| \nabla l(\mathbf{X}, \boldsymbol{\theta}^*) \right\|_2^4 > t \right) dt \\ &= 4 \int_0^\infty \mathbb{P} \left( \left\| \nabla l(\mathbf{X}, \boldsymbol{\theta}^*) \right\|_2 > t \right) t^3 dt \\ &\leq 8 \int_0^\infty e^{-t^2/2} t^3 dt = 4\Gamma(2) < \infty, \end{aligned}$$

where  $\Gamma(x)$  is Gamma function. Thus

$$\sum_{i=1}^N \mathbb{E} \left( \left\| \nabla l(\mathbf{X}_i, \boldsymbol{\theta}^*) / \sqrt{N} \right\|_2^2 \mathbb{I} \left\{ \left\| \nabla l(\mathbf{X}_i, \boldsymbol{\theta}^*) / \sqrt{N} \right\|_2 > \varepsilon \right\} \right) = o(1).$$

Then the result follows from Lindeberg–Feller central limit theorem.  $\square$

## A.3 Proof of Theorem 5.2

*Proof.* The gradient of logistic regression is  $\nabla l(\mathbf{X}, \boldsymbol{\theta}) = -Y\mathbf{X}/(1 + \exp(Y\mathbf{X}^\top\boldsymbol{\theta}))$ , then we have for any  $\lambda \in \mathbb{R}$

$$\sup_{\|\mathbf{u}\|_2=1} \mathbb{E} [\exp(\lambda |\mathbf{u}^\top \nabla l(\mathbf{X}, \boldsymbol{\theta}^*)|)] \leq \sup_{\|\mathbf{u}\|_2=1} \mathbb{E} [\exp(\lambda |\mathbf{u}^\top \mathbf{X}|)] \leq \exp(\lambda^2).$$

It implies that condition (C5) holds. Let  $p(\boldsymbol{\theta}) = (1 + \exp(-\mathbf{X}^\top\boldsymbol{\theta}))^{-1}$  and using  $p(\boldsymbol{\theta})(1 - p(\boldsymbol{\theta})) < 1$ , we have

$$\sup_{\|\mathbf{u}\|_2=1} \mathbb{E} \left[ \exp \left( \lambda |\mathbf{u}^\top \mathbf{X} \sqrt{p(\boldsymbol{\theta})(1 - p(\boldsymbol{\theta}))}| \right) \right] \leq \exp(\lambda^2).$$

Let  $\mathbf{Z} = \mathbf{X} \sqrt{p(\boldsymbol{\theta})(1 - p(\boldsymbol{\theta}))}$  then  $\mathbf{I}(\boldsymbol{\theta}) = \mathbb{E}(\mathbf{Z}\mathbf{Z}^\top)$ . Then according to Theorem 6.5 in [Wainwright \(2019\)](#), we can prove that

$$\max_k \|\mathbf{H}_k(\boldsymbol{\theta}) - \mathbf{I}(\boldsymbol{\theta})\|_2 = O_{\mathbb{P}} \left( \sqrt{\frac{p}{n}} \right).$$

From Proposition D.1 in [Chen et al. \(2018\)](#), we can verify condition (C3) and (C4). Therefore, the  $\ell_2$  error bound can be obtained from the proof of Theorem 5.1.  $\square$

#### A.4 Proof of Theorem 5.3

*Proof.* For the ease of the representation, we use  $\hat{\boldsymbol{\theta}}$  to denote  $\hat{\boldsymbol{\theta}}_{\text{Pen-CASE}}$ . By the optimality of  $\hat{\boldsymbol{\theta}}$ , we have

$$\begin{aligned} & \frac{1}{2(m+1)} \hat{\boldsymbol{\theta}}^{\text{T}} \left( \sum_{k=0}^m \mathbf{H}_k(\hat{\boldsymbol{\theta}}_k) \right) \hat{\boldsymbol{\theta}} - \frac{1}{m+1} \left( \sum_{k=0}^m \mathbf{H}_k(\hat{\boldsymbol{\theta}}_k) \hat{\boldsymbol{\theta}}_k \right)^{\text{T}} \hat{\boldsymbol{\theta}} + \lambda_n \|\hat{\boldsymbol{\theta}}\|_1 \\ & \leq \frac{1}{2(m+1)} \boldsymbol{\theta}^{*\text{T}} \left( \sum_{k=0}^m \mathbf{H}_k(\hat{\boldsymbol{\theta}}_k) \right) \boldsymbol{\theta}^* - \frac{1}{m+1} \left( \sum_{k=0}^m \mathbf{H}_k(\hat{\boldsymbol{\theta}}_k) \hat{\boldsymbol{\theta}}_k \right)^{\text{T}} \boldsymbol{\theta}^* + \lambda_n \|\boldsymbol{\theta}^*\|_1, \end{aligned}$$

which implies that

$$\begin{aligned} & \frac{1}{2(m+1)} (\hat{\boldsymbol{\theta}} - \boldsymbol{\theta}^*)^{\text{T}} \left( \sum_{k=0}^m \mathbf{H}_k(\hat{\boldsymbol{\theta}}_k) \right) (\hat{\boldsymbol{\theta}} - \boldsymbol{\theta}^*) + \lambda_n \|\hat{\boldsymbol{\theta}}\|_1 \\ & \leq \frac{1}{m+1} \left( \sum_{k=0}^m \mathbf{H}_k(\hat{\boldsymbol{\theta}}_k) (\hat{\boldsymbol{\theta}}_k - \boldsymbol{\theta}^*) \right)^{\text{T}} (\hat{\boldsymbol{\theta}} - \boldsymbol{\theta}^*) + \lambda_n \|\boldsymbol{\theta}^*\|_1. \end{aligned} \tag{A.6}$$

Note that,

$$\begin{aligned} & \left\| \frac{1}{m+1} \sum_{k=0}^m \mathbf{H}_0(\hat{\boldsymbol{\theta}}_k) (\hat{\boldsymbol{\theta}}_k - \boldsymbol{\theta}^*) \right\|_{\infty} \\ & \leq \left\| \frac{1}{m+1} \sum_{k=0}^m \nabla L_k(\boldsymbol{\theta}^*) \right\|_{\infty} + \max_{0 \leq k \leq m} \left\| \mathbf{H}_k(\tilde{\boldsymbol{\theta}}_k)^{-1} \left( \mathbf{H}_0(\hat{\boldsymbol{\theta}}_k) - \mathbf{H}_k(\tilde{\boldsymbol{\theta}}_k) \right) \right\|_2 \|\nabla L_k(\boldsymbol{\theta}^*)\|_2. \end{aligned} \tag{A.7}$$

From the proof of Theorem 5.1 and the definition of  $\lambda_n$ , there exists some sufficiently large  $C_3$  such that

$$\left\| \frac{1}{m+1} \sum_{k=0}^m \mathbf{H}_k(\hat{\boldsymbol{\theta}}_k) (\hat{\boldsymbol{\theta}}_k - \boldsymbol{\theta}^*) \right\|_{\infty} \leq \frac{\lambda_n}{2}. \tag{A.8}$$

Under event  $E$ ,  $\sum_{k=0}^m \mathbf{H}_k(\hat{\boldsymbol{\theta}}_k)/(m+1)$  is positive definite, combining with (A.6) we have

$$\lambda_n \|\hat{\boldsymbol{\theta}}\|_1 \leq \frac{\lambda_n}{2} \|\hat{\boldsymbol{\theta}} - \boldsymbol{\theta}^*\|_1 + \lambda_n \|\boldsymbol{\theta}^*\|_1.$$

Then using the fact  $\boldsymbol{\theta}_{S^c}^* = \mathbf{0}$ , we can obtain  $\|\hat{\boldsymbol{\theta}} - \boldsymbol{\theta}^*\|_1 \leq 4\|\hat{\boldsymbol{\theta}}_S - \boldsymbol{\theta}_S^*\|_1$ . From (A.6), we also have

$$(1 - \rho) \lambda_- \|\hat{\boldsymbol{\theta}} - \boldsymbol{\theta}^*\|_2^2 \leq \frac{3\lambda_n}{2} \|\hat{\boldsymbol{\theta}} - \boldsymbol{\theta}^*\|_1 \leq 6\lambda_n \sqrt{s} \|\hat{\boldsymbol{\theta}} - \boldsymbol{\theta}^*\|_2,$$

where the first inequality follows from Lemma A.2 and the second inequality follows from  $\|\hat{\boldsymbol{\theta}} - \boldsymbol{\theta}^*\|_1 \leq 4\|\hat{\boldsymbol{\theta}}_S - \boldsymbol{\theta}_S^*\|_1$ . Under condition (C5), for any  $\lambda > 0$  there exists some positive constant  $c$  such that

$$\max_{1 \leq j \leq p} \mathbb{E}[\exp(\lambda \nabla_j l(\mathbf{X}, \boldsymbol{\theta}^*))] \leq \exp(\lambda^2).$$

Then using the maximum sub-gaussian inequality, we have

$$\mathbb{P} \left( \left\| \frac{1}{m+1} \sum_{k=0}^m \nabla L_k(\boldsymbol{\theta}) \right\|_{\infty} \geq c \sqrt{\frac{\log N}{N}} \right) \leq pN^{-c^2/2}.$$

□

#### A.5 Proof of Theorem 5.4

*Proof.* We first define the oracle problem:

$$\hat{\boldsymbol{\theta}}_S^{\circ} = \arg \min_{\boldsymbol{\theta} \in \mathbb{R}^S} \frac{1}{2(m+1)} \boldsymbol{\theta}^{\text{T}} \left( \sum_{k=0}^m \mathbf{H}_k(\hat{\boldsymbol{\theta}}_k) \right)_{SS} \boldsymbol{\theta} - \frac{1}{m+1} \left( \sum_{k=0}^m \mathbf{H}_k(\hat{\boldsymbol{\theta}}_k) \hat{\boldsymbol{\theta}}_k \right)_{SS}^{\text{T}} \boldsymbol{\theta} + \lambda_n \|\boldsymbol{\theta}\|_1.$$

Let  $\widehat{\mathbf{H}} = \sum_{k=0}^m \mathbf{H}_k(\widehat{\boldsymbol{\theta}}_k)/(m+1)$  and  $\mathbf{b} = \sum_{k=0}^m \mathbf{H}_k(\widehat{\boldsymbol{\theta}}_k)\widehat{\boldsymbol{\theta}}_k/(m+1)$ , then by the KKT condition we have

$$\widehat{\mathbf{H}}_{SS}\widehat{\boldsymbol{\theta}}_S^o - \mathbf{b}_S + \lambda_n \mathbf{z}_S = \mathbf{0},$$

which implies that  $\widehat{\boldsymbol{\theta}}_S^o = \widehat{\mathbf{H}}_{SS}^{-1}(\mathbf{b}_S - \lambda_n \mathbf{z}_S)$ . If we can prove there exists  $\mathbf{z}_{S^c} \in \mathbb{R}^{p-s}$  satisfying the zero subgradient condition

$$\widehat{\mathbf{H}}_{S^cS}\widehat{\boldsymbol{\theta}}_S^o - \mathbf{b}_{S^c} + \lambda_n \mathbf{z}_{S^c} = \mathbf{0}$$

and  $\|\mathbf{z}\|_\infty < 1$ , then  $\widehat{S} \subseteq S$ . Substitute  $\widehat{\boldsymbol{\theta}}_S^o$  to the above equation then we can write  $\mathbf{z}_{S^c}$  as

$$\begin{aligned} \mathbf{z}_{S^c} &= \lambda_n^{-1} \left\{ \mathbf{b}_{S^c} - \widehat{\mathbf{H}}_{S^cS}\widehat{\mathbf{H}}_{SS}^{-1}(\mathbf{b}_S - \lambda_n \mathbf{z}_S) \right\} \\ &= \lambda_n^{-1} \left\{ \mathbf{b}_{S^c} - \widehat{\mathbf{H}}_{S^cS}\widehat{\mathbf{H}}_{SS}^{-1}\mathbf{b}_S \right\} + \widehat{\mathbf{H}}_{S^cS}\widehat{\mathbf{H}}_{SS}^{-1}\mathbf{z}_S \\ &= \lambda_n^{-1} \left\{ \left[ \frac{1}{m+1} \mathbf{H}_k(\widehat{\boldsymbol{\theta}}_k) (\widehat{\boldsymbol{\theta}}_k - \boldsymbol{\theta}^*) \right]_{S^c} - \widehat{\mathbf{H}}_{S^cS}\widehat{\mathbf{H}}_{SS}^{-1} \left[ \frac{1}{m+1} \mathbf{H}_k(\widehat{\boldsymbol{\theta}}_k) (\widehat{\boldsymbol{\theta}}_k - \boldsymbol{\theta}^*) \right]_S \right\} + \widehat{\mathbf{H}}_{S^cS}\widehat{\mathbf{H}}_{SS}^{-1}\mathbf{z}_S. \end{aligned}$$

Let  $\mathbf{I} = \mathbf{I}(\boldsymbol{\theta}^*)$ , then note that

$$\widehat{\mathbf{H}}_{S^cS}\widehat{\mathbf{H}}_{SS}^{-1} = \left( \widehat{\mathbf{H}}_{S^cS} - \mathbf{I}_{S^cS} \right) \left( \widehat{\mathbf{H}}_{SS}^{-1} - \mathbf{I}_{SS}^{-1} \right) + \mathbf{I}_{S^cS} \left( \widehat{\mathbf{H}}_{SS}^{-1} - \mathbf{I}_{SS}^{-1} \right) + \left( \widehat{\mathbf{H}}_{S^cS} - \mathbf{I}_{S^cS} \right) \mathbf{I}_{SS}^{-1} + \mathbf{I}_{S^cS}\mathbf{I}_{SS}^{-1}.$$

According to Lemma A.3 we have

$$\left\| \widehat{\mathbf{H}}_{SS}^{-1} - \mathbf{I}_{SS}^{-1} \right\|_2 \lesssim \sqrt{\frac{p}{n}}.$$

Moreover,

$$\left\| \widehat{\mathbf{H}}_{S^cS} - \mathbf{I}_{S^cS} \right\|_2 \leq \max_{0 \leq k \leq m} \left\| \mathbf{H}_k(\widehat{\boldsymbol{\theta}}_k) - \mathbf{I}(\boldsymbol{\theta}^*) \right\|_2 \lesssim \sqrt{\frac{p}{n}}.$$

Then we have

$$\left\| \left( \widehat{\mathbf{H}}_{S^cS} - \mathbf{I}_{S^cS} \right) \left( \widehat{\mathbf{H}}_{SS}^{-1} - \mathbf{I}_{SS}^{-1} \right) \right\|_\infty \leq s \left\| \widehat{\mathbf{H}}_{S^cS} - \mathbf{I}_{S^cS} \right\|_2 \left\| \widehat{\mathbf{H}}_{SS}^{-1} - \mathbf{I}_{SS}^{-1} \right\|_2 \lesssim \frac{sp}{n},$$

$$\left\| \mathbf{I}_{S^cS} \left( \widehat{\mathbf{H}}_{SS}^{-1} - \mathbf{I}_{SS}^{-1} \right) \right\|_\infty \leq s \|\mathbf{I}\|_2 \left\| \widehat{\mathbf{H}}_{SS}^{-1} - \mathbf{I}_{SS}^{-1} \right\|_2 \lesssim s \sqrt{\frac{p}{n}},$$

and

$$\left\| \left( \widehat{\mathbf{H}}_{S^cS} - \mathbf{I}_{S^cS} \right) \mathbf{I}_{SS}^{-1} \right\|_\infty \leq s \|\mathbf{I}_{SS}^{-1}\|_2 \left\| \widehat{\mathbf{H}}_{S^cS} - \mathbf{I}_{S^cS} \right\|_2 \lesssim s \sqrt{\frac{p}{n}}.$$

Combing the results above, it follows that  $\left\| \widehat{\mathbf{H}}_{S^cS}\widehat{\mathbf{H}}_{SS}^{-1} \right\|_\infty \lesssim \left\| \mathbf{I}_{S^cS}\mathbf{I}_{SS}^{-1} \right\|_\infty + s\sqrt{p}/\sqrt{n}$ . Due to the definition of  $\lambda_n$  and (A.8), there exists some sufficiently large positive constant  $C_0$  such that

$$\|\mathbf{z}_{S^c}\|_\infty \leq \frac{1}{C_0} + \left\| \mathbf{I}_{S^cS}\mathbf{I}_{SS}^{-1} \right\|_\infty < \frac{1}{C_0} + \alpha < 1$$

with probability tending to 1. Using the fact  $\boldsymbol{\theta}_S^* = \widehat{\mathbf{H}}_{SS}^{-1}(\widehat{\mathbf{H}}\boldsymbol{\theta}^*)_S$ , we can obtain

$$\begin{aligned} \left\| \widehat{\boldsymbol{\theta}}_S^o - \boldsymbol{\theta}_S^* \right\|_\infty &\leq \left\| \widehat{\mathbf{H}}_{SS}^{-1} \right\|_\infty \left\| \frac{1}{m+1} \mathbf{H}_k(\widehat{\boldsymbol{\theta}}_k) (\widehat{\boldsymbol{\theta}}_k - \boldsymbol{\theta}^*) \right\|_\infty + \left\| \lambda_n \widehat{\mathbf{H}}_{SS}^{-1} \mathbf{z}_S \right\|_\infty \\ &\lesssim \left\| \mathbf{I}_{SS}^{-1} \right\|_\infty \lambda_n. \end{aligned}$$

□

## A.6 Proof of Theorem 5.5

*Proof.* It suffices to prove that

$$\left\| \widehat{\mathbf{C}}_0 \left( \boldsymbol{\theta}^* - \frac{1}{m+1} \sum_{k=0}^m \widehat{\boldsymbol{\theta}}_k \right) \right\|_{\infty} = O_{\mathbb{P}} \left( \sqrt{\frac{\log N}{N}} \right). \quad (\text{A.9})$$

Note that

$$\frac{1}{m+1} \sum_{k=0}^m \widehat{\boldsymbol{\theta}}_k - \boldsymbol{\theta}^* = \frac{1}{m+1} \sum_{k=0}^m \widehat{\mathbf{C}}_k^{-1} \frac{1}{n} \sum_{i \in \mathcal{H}_k} \mathbf{X}_i \epsilon_i,$$

where  $\widehat{\mathbf{C}}_k = \sum_{i \in \mathcal{H}_k} \mathbf{X}_i \mathbf{X}_i^{\text{T}} / n$ . Moreover, using the subgaussian property of  $\mathbf{X}_i$  and  $\epsilon_i$  we can easily obtain  $\max_k \|\widehat{\mathbf{C}}_k - \mathbf{C}\|_2 = O_{\mathbb{P}}(\sqrt{p/n})$ ,  $\max_k \|\sum_{i \in \mathcal{H}_k} \mathbf{X}_i \epsilon_i / n\|_2 = O_{\mathbb{P}}(\sqrt{p/n})$  and  $\|\sum_{k=0}^m \sum_{i \in \mathcal{H}_k} \mathbf{X}_i \epsilon_i / N\|_{\infty} = O_{\mathbb{P}}(\sqrt{\log N / N})$ . It follows that

$$\begin{aligned} \left\| \widehat{\mathbf{C}}_0 \left( \boldsymbol{\theta}^* - \frac{1}{m+1} \sum_{k=0}^m \widehat{\boldsymbol{\theta}}_k \right) \right\|_{\infty} &= \left\| \frac{1}{m+1} \sum_{k=0}^m \widehat{\mathbf{C}}_0 \widehat{\mathbf{C}}_k^{-1} \frac{1}{n} \sum_{i \in \mathcal{H}_k} \mathbf{X}_i \epsilon_i \right\|_{\infty} \\ &\leq \left\| \frac{1}{N} \sum_{k=0}^m \sum_{i \in \mathcal{H}_k} \mathbf{X}_i \epsilon_i \right\|_{\infty} + \max_k \|\widehat{\mathbf{C}}_k^{-1}\|_2 \|\widehat{\mathbf{C}}_0 - \widehat{\mathbf{C}}_k\|_2 \left\| \frac{1}{n} \sum_{i \in \mathcal{H}_k} \mathbf{X}_i \epsilon_i \right\|_2 \\ &= O_{\mathbb{P}} \left( \sqrt{\frac{\log N}{N}} + \frac{p}{n} \right). \end{aligned}$$

Then (A.9) follows from  $m \lesssim \sqrt{N \log N} / p$ . □

## B Proof of Auxiliary Lemmas

### B.1 Proof of Lemma A.1

*Proof.* Note that the variational representation  $\|\nabla L_k(\boldsymbol{\theta}^*)\|_2 = \sup_{\mathbf{u} \in S^{p-1}} |\mathbf{u}^{\text{T}} \nabla L_k(\boldsymbol{\theta}^*)|$ , where  $S^{p-1}$  is the sphere in  $\mathbb{R}^p$ . Let  $\{\mathbf{u}_1, \dots, \mathbf{u}_M\}$  be a  $1/2$ -covering with  $M \leq 5^p$  vectors. For any  $\mathbf{u} \in S^{p-1}$ , there is some  $\mathbf{u}_j$  such that  $\mathbf{u} = \mathbf{u}_j + \Delta$  with  $\|\Delta\|_2 \leq 1/2$ . Thus we have

$$\mathbf{u}^{\text{T}} \nabla L_k(\boldsymbol{\theta}^*) = \mathbf{u}_j^{\text{T}} \nabla L_k(\boldsymbol{\theta}^*) + \Delta^{\text{T}} \nabla L_k(\boldsymbol{\theta}^*),$$

which indicates that

$$|\mathbf{u}^{\text{T}} \nabla L_k(\boldsymbol{\theta}^*)| \leq |\mathbf{u}_j^{\text{T}} \nabla L_k(\boldsymbol{\theta}^*)| + \frac{1}{2} \|\nabla L_k(\boldsymbol{\theta}^*)\|_2.$$

It yields that

$$\|\nabla L_k(\boldsymbol{\theta}^*)\|_2 \leq 2 \max_{1 \leq j \leq M} |\mathbf{u}_j^{\text{T}} \nabla L_k(\boldsymbol{\theta}^*)|.$$

Then we have,

$$\begin{aligned} \mathbb{E} [\exp(\lambda \|\nabla L_k(\boldsymbol{\theta}^*)\|_2)] &\leq \mathbb{E} \left[ \exp \left( 2\lambda \max_{1 \leq j \leq M} |\mathbf{u}_j^{\text{T}} \nabla L_k(\boldsymbol{\theta}^*)| \right) \right] \\ &\leq \sum_{j=1}^M \mathbb{E} [\exp(2\lambda |\mathbf{u}_j^{\text{T}} \nabla L_k(\boldsymbol{\theta}^*)|)]. \end{aligned}$$

Due to the definition of  $\nabla L_k(\boldsymbol{\theta}^*)$  and condition (C5), we have

$$\begin{aligned} \mathbb{E} [\exp(2\lambda |\mathbf{u}_j^{\text{T}} \nabla L_k(\boldsymbol{\theta}^*)|)] &\leq \prod_{i=1}^n \mathbb{E} \left[ \exp \left( \frac{2\lambda}{n} |\mathbf{u}_j^{\text{T}} \nabla l(\mathbf{X}_i, \boldsymbol{\theta}^*)| \right) \right] \\ &\leq \exp \left( \frac{4\lambda^2}{n} \right). \end{aligned}$$

Consequently, we have

$$\mathbb{E} [\exp (\lambda \|\nabla L_k(\boldsymbol{\theta}^*)\|_2)] \leq 5^p \exp \left( \frac{4\lambda^2}{n} \right) \leq \exp \left( \frac{4\lambda^2}{n} + 2p \right). \quad (\text{B.1})$$

Then it follows that

$$\mathbb{P} \left( \|\nabla L_k(\boldsymbol{\theta}^*)\|_2 \geq C_2 \sqrt{\frac{p}{n}} + t \right) \leq C_3 \exp (-C_4 n t^2)$$

for some constants  $C_2, C_3$  and  $C_4$ . □

## B.2 Proof of Lemma A.4

*Proof.* From the proof of Lemma A.1,

$$\begin{aligned} \mathbb{P}(E_{0k}^c) &= \mathbb{P} \left( \|\nabla L_k(\boldsymbol{\theta}^*)\|_2 \geq \frac{(1-\rho)\lambda_- \delta_\rho}{2} \right) \leq 2 \exp \left( \frac{4\lambda^2}{n} + 2p - \frac{\lambda(1-\rho)\lambda_- \delta_\rho}{2} \right) \\ &\leq 2 \exp \left( -\frac{(1-\rho)\lambda_- \delta_\rho}{32} n + 2p \right) \leq 2 \exp (-c_0 n + 2p). \end{aligned}$$

Then according to our condition (C4) and Markov's inequality

$$\mathbb{P}(E_{1k}^c) = \mathbb{P}(M_k \geq M) \leq \frac{\mathbb{E}(\sum_{i \in \mathcal{H}_k} M(\mathbf{X}_i))^K}{n^K M} \leq c_1 n^{-K/2}.$$

Using (B.1) in Lemma A.3, we have

$$\begin{aligned} \mathbb{P}(E_{2k}^c) &= \mathbb{P} \left( \|\mathbf{H}_k(\boldsymbol{\theta}^*) - \mathbf{I}(\boldsymbol{\theta}^*)\|_2 \geq \frac{\rho\lambda_-}{2} \right) \leq \frac{2^K \mathbb{E} \left( \|\mathbf{H}_k(\boldsymbol{\theta}^*) - \mathbf{I}(\boldsymbol{\theta}^*)\|_2^K \right)}{\rho^K \lambda_-^K} \\ &\leq (2L)^K (\rho\lambda_-)^{-K} \left( \frac{\log 2p}{n} \right)^{K/2} \leq c_2 \left( \frac{\log 2p}{n} \right)^{K/2}. \end{aligned}$$

Therefore, using the union bound we can obtain that

$$\mathbb{P}(E^c) \leq m \left( 2e^{(-c_0 n + 2p)} + c_1 n^{-K/2} + c_2 \left( \frac{\log 2p}{n} \right)^{K/2} \right).$$

□

## References

- Chen, X., Liu, W., and Zhang, Y. (2018). First-order newton-type estimator for distributed estimation and inference. *ArXiv*, abs/1811.11368.
- Wainwright, M. J. (2019). *High-Dimensional Statistics: A Non-Asymptotic Viewpoint*. Cambridge Series in Statistical and Probabilistic Mathematics. Cambridge University Press.
- Zhang, Y., Duchi, J. C., and Wainwright, M. J. (2013). Communication-efficient algorithms for statistical optimization. *Journal of Machine Learning Research*, 14:3321–3363.
